# Supplementary material
Source: PubMed Central journal article supplement (PMC4884334)
Supplement: Supp_Figure1.pdf [file Supp_Figure1.pdf]

## Supplementary Data

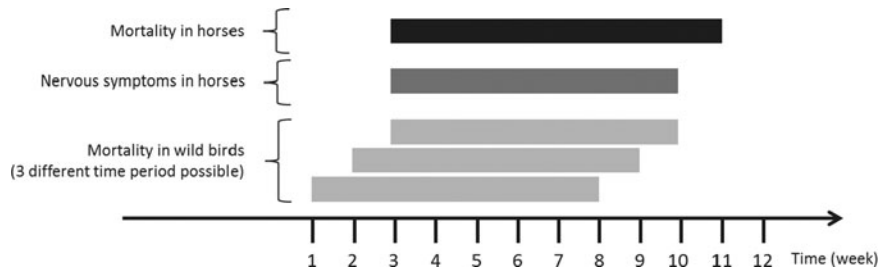

**SUPPLEMENTARY FIG. S1.** Course of WNV outbreak considering mortality in wild birds, nervous symptoms in horses, and mortality in horses: duration of syndromes and time lag between them. WNV, West Nile virus.
