# Supplementary material
Source: PubMed Central journal article supplement (PMC4884334)
Supplement: Supp_Figure2.pdf [file Supp_Figure2.pdf]

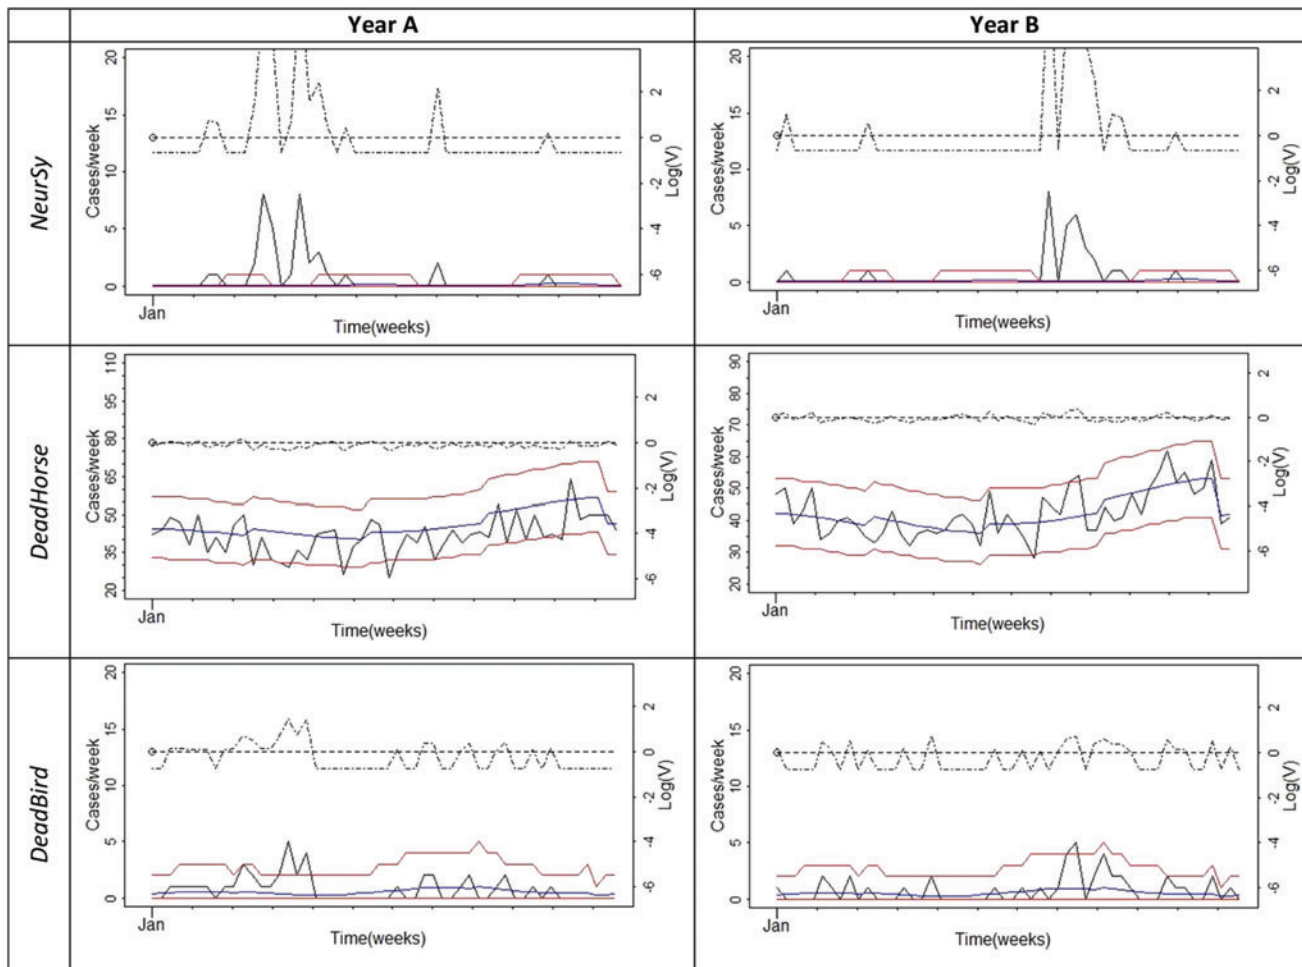

**SUPPLEMENTARY FIG. S2.** Examples of simulated baseline with inserted outbreak and corresponding variation of the value of evidence ( $V$ ). *Solid black line*, simulated data; *solid blue line*, predicted value; *solid red line*, 95% confidence interval; *dotted lines*,  $\log_{10}(V)$ .
