# Supplementary material
Source: PubMed Central journal article supplement (PMC4884334)
Supplement: Supp_Table1.pdf [file Supp_Table1.pdf]

SUPPLEMENTARY TABLE S1. NEGATIVE BINOMIAL MODEL USED TO REMOVE EXTREME VALUES  
FROM *DEADBIRD* USING TSUI ET AL. APPROACH

| <i>Negative binomial distribution</i>                       |              |             |            |            |                         |
|-------------------------------------------------------------|--------------|-------------|------------|------------|-------------------------|
| <i>Formulae</i>                                             | <i>Theta</i> | <i>Mean</i> | <i>AIC</i> | <i>GOF</i> | <i>RMSE<sub>c</sub></i> |
| DeadBird $\sim 8 \times (3 + t) / 52 + \sin(2\pi t / 26.5)$ | 0.22         | 0.79        | 819        | 0.65       | 1.84                    |

AIC, Akaike information criterion; GOF, goodness-of-fit; RMSE, root-mean-squared error.
