# Supplementary material
Source: PubMed Central journal article supplement (PMC4884334)
Supplement: Supp_Table2.pdf [file Supp_Table2.pdf]

SUPPLEMENTARY TABLE S2. VARIABLES TESTED  
FOR EACH TIME SERIES AVAILABLE AND FOR POISSON  
AND NEGATIVE BINOMIAL DISTRIBUTIONS

| <i>Variable name</i> | <i>Variable description</i>                                                     |
|----------------------|---------------------------------------------------------------------------------|
| year                 | Year considered                                                                 |
| week                 | Week of the year considered                                                     |
| time                 |                                                                                 |
| season               | Week number according to the total number<br>of weeks available in the data set |
| month                | Month of the year considered                                                    |
| sin                  | $\sin(2*\pi*(week/53))$                                                         |
| cos                  | $\cos(2*\pi*(week/53))$                                                         |
| period8              | $\text{Round}(week*8/52)$                                                       |
| period8shift         | $\text{Round}((3+week)*8/52)$                                                   |
| season.shift2        | $\text{Round}((week-4)*4/52)$                                                   |
| sinX2                | $\sin(2*\pi* week/26.5)$                                                        |
| sinX2.shift          | $\sin(2*\pi*(week-6)/26.5)$                                                     |
| sinminus6            | $\sin(2*\pi*(week-6)/53)$                                                       |
| sinminus12           | $\sin(2*\pi*(week-12)/53)$                                                      |
| sinminus18           | $\sin(2*\pi*(week-18)/53)$                                                      |
| sinX4.shift          | $\sin(2*\pi*(week-3)/13.25)$                                                    |
| sinX4                | $\sin(2*\pi*(week)/13.25)$                                                      |
| sinX3.shift          | $\sin(2*\pi*(week-4)/18.33)$                                                    |
| sinX3                | $\sin(2*\pi*(week)/18.33)$                                                      |
| histmean             | mean of the 53 previous weeks<br>(and guard band of 4 weeks)                    |
